# Supplementary material for: Regulation of Cell Proliferation and Nrf2-Mediated Antioxidant Defense: Conservation of Keap1 Cysteines and Nrf2 Binding Site in the Context of the Evolution of KLHL Family
Source: MDPI journal article supplement (doi:10.3390/life13041045), 2023-04-19

## Supplementary file 1

to the article: “Regulation of Cell Proliferation and Nrf2-Mediated Antioxidant Defense: conservation of Keap1 cysteines and Nrf2 binding site in the context of the evolution of KLHL Family”.

**Table S1. 50 human proteins which were studied in this paper.** Sorting of proteins is done according to the phylogenetic tree in **Figure 3** of the main text.

| Protein ID     | Clade | Name    | UniProt ID  | Other names                                            |
|----------------|-------|---------|-------------|--------------------------------------------------------|
| NP_001243503.1 | 3     | KLHL37  | ENC1_HUMAN  | Ectoderm-neural cortex protein 1 (ENC1)                |
| NP_071925.2    | 3     | KLHL25  | KLH25_HUMAN | Ectoderm-neural cortex protein 2 (ENC2)                |
| NP_001186219.1 | 3     | KLHL23  | KLH23_HUMAN |                                                        |
| NP_055666.2    | 3     | KLHL21  | KLH21_HUMAN |                                                        |
| NP_940984.3    | 3     | KLHL30  | KLH30_HUMAN |                                                        |
| NP_443152.1    | 3     | KLHL29  | KLH29_HUMAN |                                                        |
| NP_001075144.2 | 3     | KLHL38  | KLH38_HUMAN |                                                        |
| NP_569713.2    | 3     | KLHL6   | KLHL6_HUMAN |                                                        |
| NP_001034637.2 | 3     | KLHL35  | KLH35_HUMAN |                                                        |
| NP_060114.2    | 3     | KLHL24  | KLH24_HUMAN | Kainate receptor-interacting protein for GluR6 (KRIP6) |
| NP_940841.1    | 3     | KBTBD3  | KBTB3_HUMAN |                                                        |
| XP_006718324.1 | 3     | KBTBD4  | KBTB4_HUMAN |                                                        |
| NP_689606.2    | 4     | KLHL40  | KLH40_HUMAN | Sarcosynapsin                                          |
| NP_006054.2    | 4     | KLHL41  | KLH41_HUMAN | Sarcosin                                               |
| NP_997218.2    | 4     | KBTBD12 | KBTBC_HUMAN |                                                        |
| NP_056298.2    | 4     | KBTBD2  | KBTB2_HUMAN |                                                        |
| NP_115894.2    | 4     | KBTBD8  | KBTB8_HUMAN | T-cell activation kelch repeat protein (TA-KRP)        |
| NP_690867.3    | 4     | KBTBD6  | KBTB6_HUMAN |                                                        |
| NP_115514.2    | 4     | KBTBD7  | KBTB7_HUMAN |                                                        |
| XP_005257330.1 | 2     | KLHL10  | KLH10_HUMAN |                                                        |
| NP_036421.2    | 2     | KLHL19  | KEAP1_HUMAN | Kelch-like ECH-associated protein 1 (Keap1)            |
| NP_005888.1    | 2     | KLHL27  | IPP_HUMAN   | Actin-binding protein IPP                              |
| XP_006715816.1 | 2     | KLHL7   | KLHL7_HUMAN |                                                        |
| XP_005267826.1 | 2     | KLHL28  | KLH28_HUMAN |                                                        |
| XP_005262711.1 | 2     | KLHL5   | KLHL5_HUMAN |                                                        |
| NP_065917.1    | 2     | KLHL1   | KLHL1_HUMAN | Mayven-related protein 2 (MRP2)                        |
| NP_476503.1    | 2     | KLHL4   | KLHL4_HUMAN |                                                        |
| NP_065854.3    | 2     | KLHL8   | KLHL8_HUMAN |                                                        |
| XP_005265058.1 | 2     | KLHL18  | KLH18_HUMAN |                                                        |
| XP_005245460.1 | 2     | KLHL12  | KLH12_HUMAN |                                                        |
| XP_006711340.1 | 2     | KLHL20  | KLH20_HUMAN | Kelch-Like ECT2 Interacting Protein (KLEIP)            |
| XP_006710663.1 | 2     | KLHL17  | KLH17_HUMAN | Actinfilin                                             |
| NP_059111.2    | 2     | KLHL3   | KLHL3_HUMAN |                                                        |
| NP_001154993.1 | 2     | KLHL2   | KLHL2_HUMAN | Actin-binding protein Mayven                           |
| NP_071324.1    | 5     | KLHL16  | GAN_HUMAN   | Gigaxonin                                              |
| NP_006460.2    | 5     | KLHL39  | NS1BP_HUMAN | Influenza virus NS1A-binding protein (IVNS1ABP)        |

|                |   |         |             |                                           |
|----------------|---|---------|-------------|-------------------------------------------|
| NP_005884.2    | 5 | KBTBD14 | CALI_HUMAN  | Calicin                                   |
| NP_060613.1    | 5 | KLHL11  | KLH11_HUMAN |                                           |
| XP_005267404.1 |   | KLHL33  | KLH33_HUMAN |                                           |
| NP_443136.2    | 1 | KLHL32  | KLH32_HUMAN |                                           |
| NP_060786.1    | 1 | KLHL26  | KLH26_HUMAN |                                           |
| XP_006724405.1 | 1 | KLHL22  | KLH22_HUMAN |                                           |
| NP_079007.2    | 1 | KLHL36  | KLH36_HUMAN |                                           |
| NP_001161771.1 | 1 | KLHL13  | KLH13_HUMAN |                                           |
| NP_061335.1    | 1 | KLHL9   | KLHL9_HUMAN |                                           |
| NP_001003760.2 | 1 | KLHL31  | KLH31_HUMAN |                                           |
| NP_085127.2    | 1 | KLHL15  | KLH15_HUMAN |                                           |
| XP_006722575.1 | 1 | KLHL14  | KLH14_HUMAN | Protein interactor of Torsin-1A (Printor) |
| NP_695002.1    | 1 | KLHL34  | KLH34_HUMAN |                                           |
| NP_065833.1    | 1 | KLHL42  | KLH42_HUMAN | Cullin-3-binding protein 9 (Ctb9)         |

### **Figure captions:**

**Figure S1. Phylogenetic tree of closest relatives of leucine-zipper-like transcription regulator 1 (LZTR1, NP\_006758.2 or LZTR1\_HUMAN).** According to our domain analysis, it can be considered as a member of the KLHL family. All proteins have the kelch-repeat domain on the N-terminus. 34 manually inspected proteins were aligned with Muscle (Edgar, 2004) and the tree for them was constructed in MEGA7 with the neighbor-joining algorithm (Kumar, et al., 2016). Numbers on the branches are the bootstrap test support calculated for the 100 replicates. All positions with less than 90% site coverage were eliminated, leaving 455 positions for the tree construction. Tree leaves are colored according to the taxonomy of the respective organisms. Domain structure was obtained with Domain Analyzer software (<https://depo.msu.ru/module/domainanalyser>) and Pfam database (Finn, et al., 2016).

**Figure S2. Phylogenetic tree of the KLHL proteins with their domain structure mapped onto it.** 449 proteins sampled as described in the Materials and Methods section were aligned with Muscle (Edgar, 2004) and the tree for them was constructed in MEGA7 with the neighbor-joining algorithm (Kumar, et al., 2016). Numbers on the branches are the bootstrap test support calculated for the 100 replicates (values lower than 10 are not shown). We used manually selected regions (conserved blocks) consisting of 202 positions for the tree construction. Domain structure was obtained with Domain Analyzer software (<https://depo.msu.ru/module/domainanalyser>) and Pfam database (Finn, et al., 2011; Finn, et al., 2016). Human proteins are shown in blue color for known members of the KLHL family and in red color for proteins previously considered to belong to the KBTBD family.

**Figure S3. Short version of the phylogenetic tree of the KLHL proteins with several important residues** (see **Figure S2** for the full version). Clades containing human proteins are collapsed to a single sequence. Positions which are known to be important for the structural integrity and function are mapped on the tree.

**Figure S4. Multiple alignment of Keap1 proteins from genomes of 9 selected Vertebrata species.** Residues which are marked in the **Figure 3** on the main text are marked in the CYS\_IMPORTANT\_RESIDUES row (X marks positions poorly aligned between different KLHL proteins, C marks aligned positions). Structurally important residues which are depicted in **Figure S3** are marked in the STRUCTURE\_AND\_FUNCTION row. Regions where good multiple alignment exists between different KLHL proteins and which were chosen for the phylogenetic tree construction are marked in the BLOCKS row. Domain boundaries as predicted by Pfam domain models for human sequence are given in the FORMULA row. Alignment was visualized in GeneDoc software (<http://nrbsc.org/gfx/genedoc>).

**Figure S5. Short version of the phylogenetic tree of the KLHL proteins with Nrf2 binding site** (see **Figure S2** for the full version). Clades containing human proteins are collapsed to a single sequence. Nrf2 binding site positions are mapped on the tree.

**Figure S6. Comparison between domain borders produced by the Pfam profile HMM search (top) and those annotated in the Uniprot/SwissProt database (bottom) for human Keap1 protein.** Search for the corresponding Pfam domains yields the following domain coordinates: BTB [67–178], BACK [185–285], Kelch1 [324–358], Kelch2 [361–410], Kelch3 [412–456], Kelch4 [459–504], Kelch5 [507–550], Kelch6 [553–597]. Uniprot annotation for the same protein (KEAP1\_HUMAN) provides the following coordinates: BTB [77–149], BACK [184–286], Kelch1 [327–372], Kelch2 [373–423], Kelch3 [424–470], Kelch4 [471–517], Kelch5 [518–564], Kelch6 [565–611]. The corresponding regions were mapped onto the AlphaFold model of Keap1 protein (provided in the Uniprot database): **(A)** BTB domain is shown in orange, BACK domain is shown in magenta. **(B)** Two neighboring blades of  $\beta$ -propeller are shown. The first Kelch domain is colored lime, the last Kelch domain is colored purple.

### **References:**

- Edgar, R.C. MUSCLE: a multiple sequence alignment method with reduced time and space complexity. *BMC Bioinformatics* 2004;5:113.
- Finn, R.D., Clements, J. and Eddy, S.R. HMMER web server: interactive sequence similarity searching. *Nucleic Acids Res* 2011;39(Web Server issue):W29-37.
- Finn, R.D., *et al.* The Pfam protein families database: towards a more sustainable future. *Nucleic Acids Res* 2016;44(D1):D279-285.
- Kumar, S., Stecher, G. and Tamura, K. MEGA7: Molecular Evolutionary Genetics Analysis Version 7.0 for Bigger Datasets. *Mol Biol Evol* 2016;33(7):1870-1874.

Figure S1. Phylogenetic tree of closest relatives of leucine-zipper-like transcription regulator 1 (LZTR1, NP\_006758.2 or LZTR1\_HUMAN)

The tree is colored according to taxonomy:

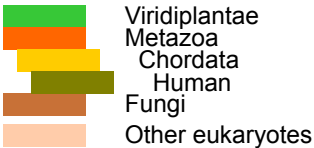

Legend for the most occuring domains

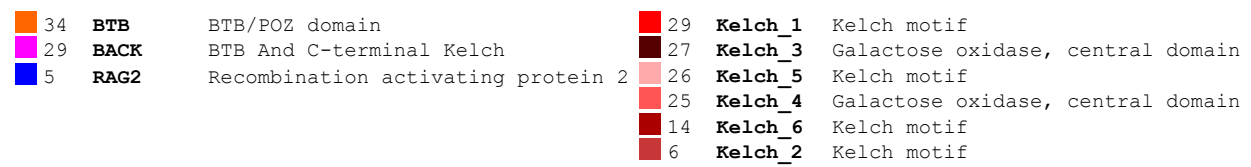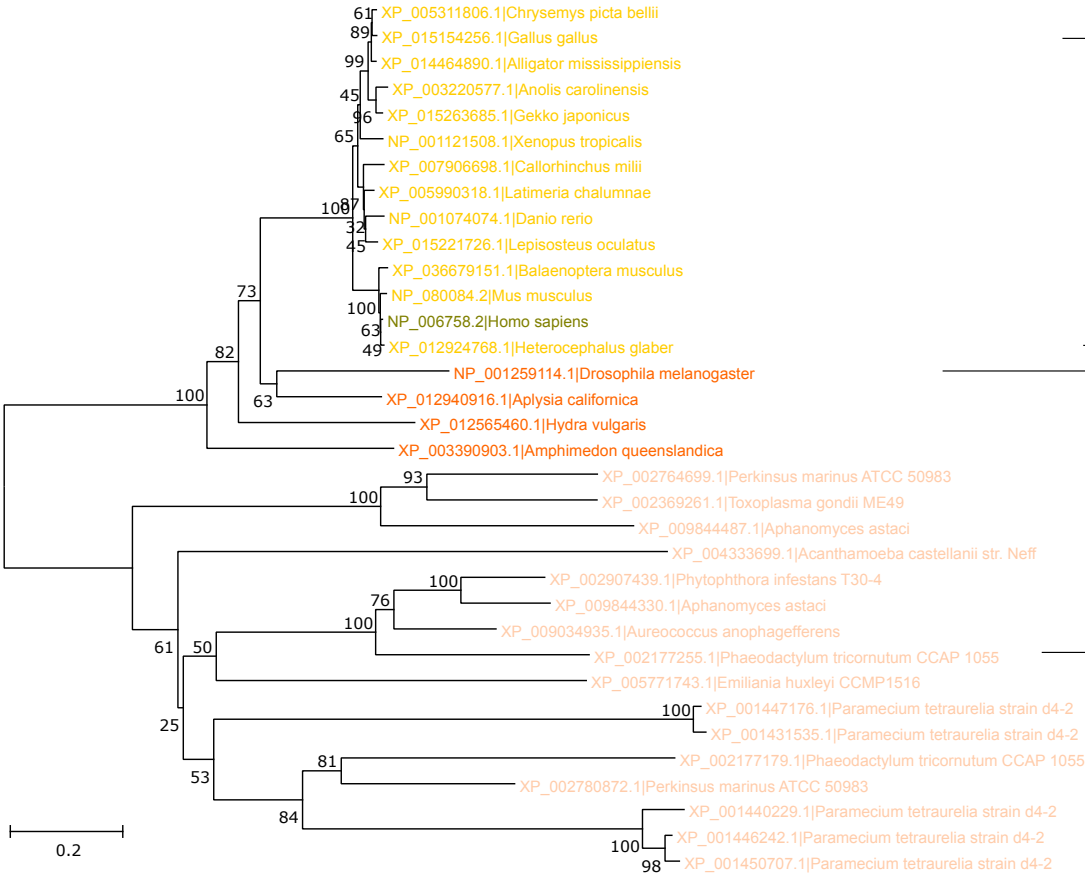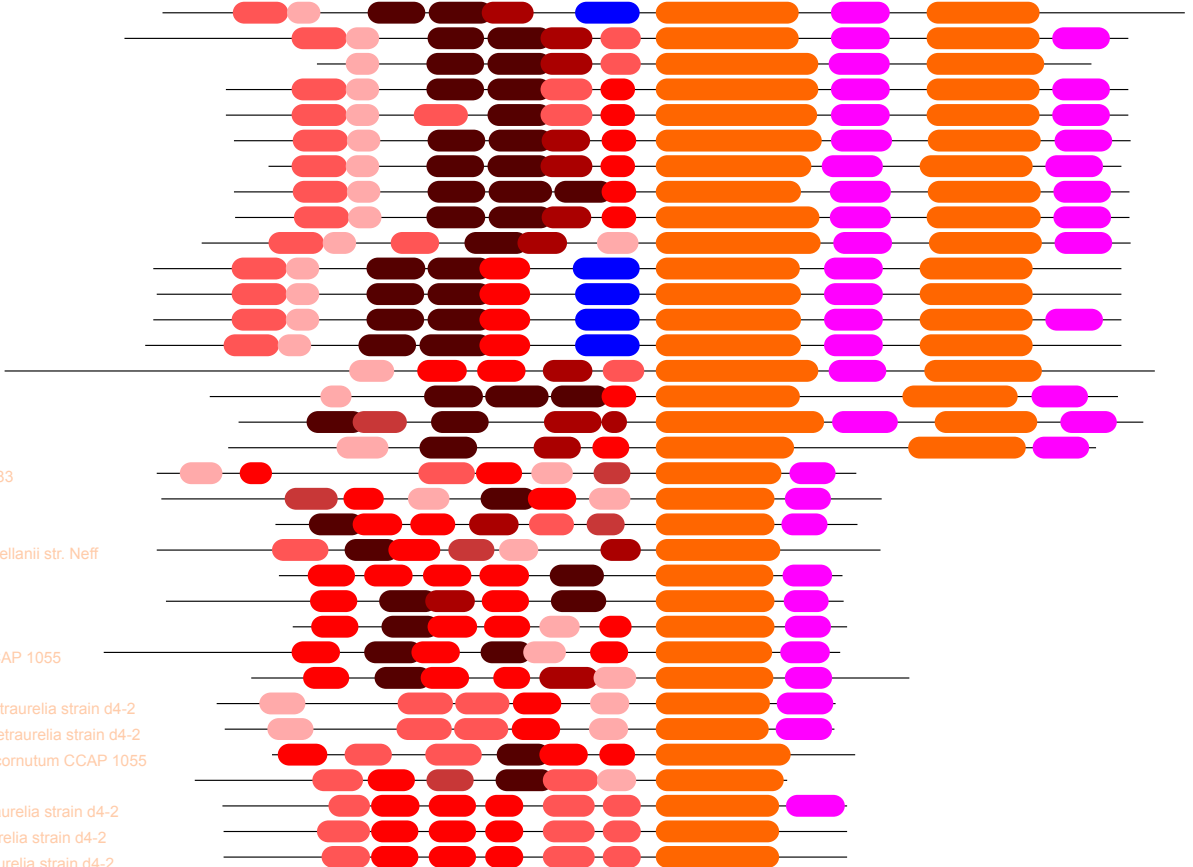



**Figure S2: Phylogenetic tree of the KLHL proteins with their domain structure mapped onto it**

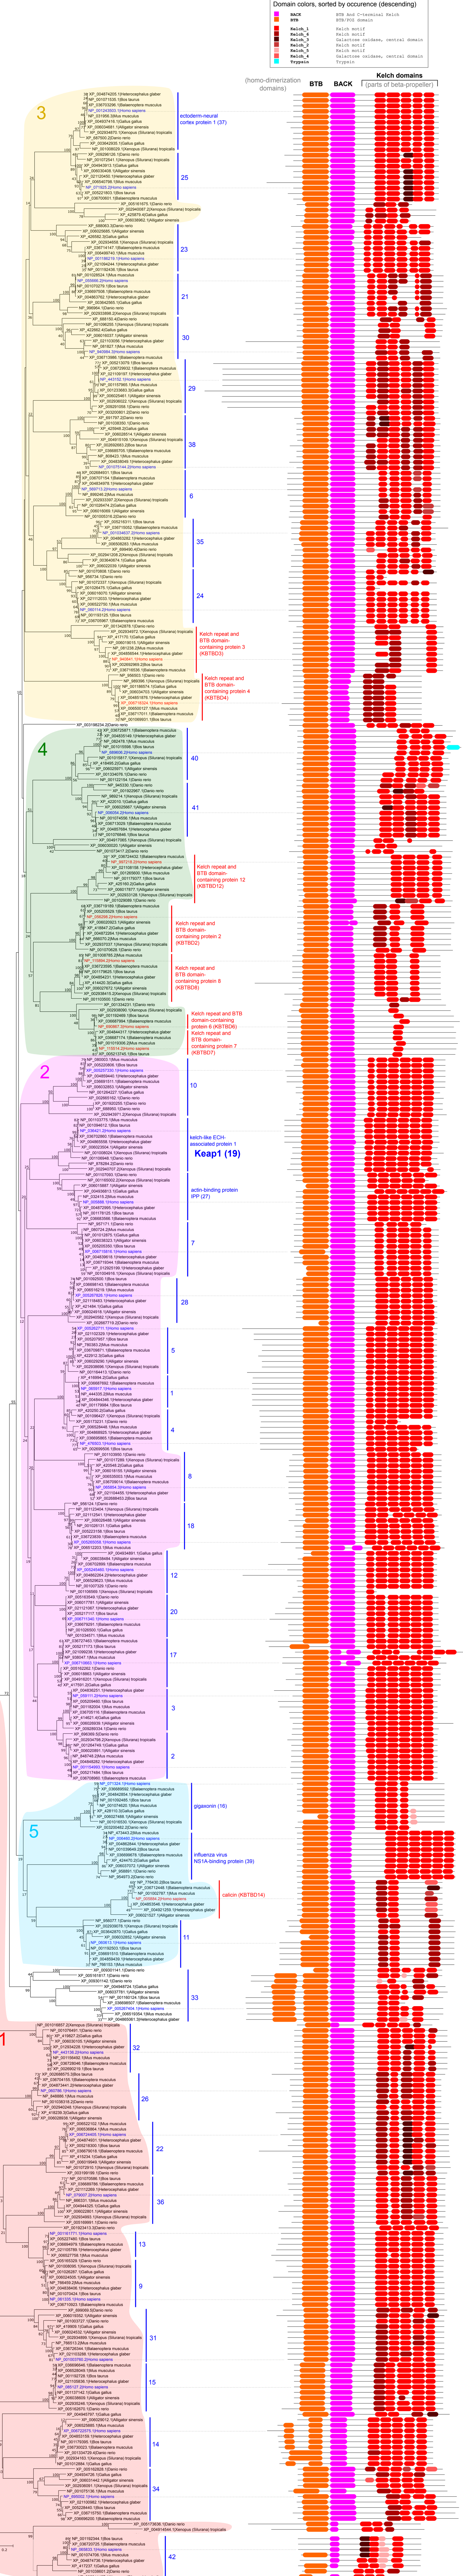



Figure S3. Short version of the phylogenetic tree of the KLHL proteins with functionally important positions

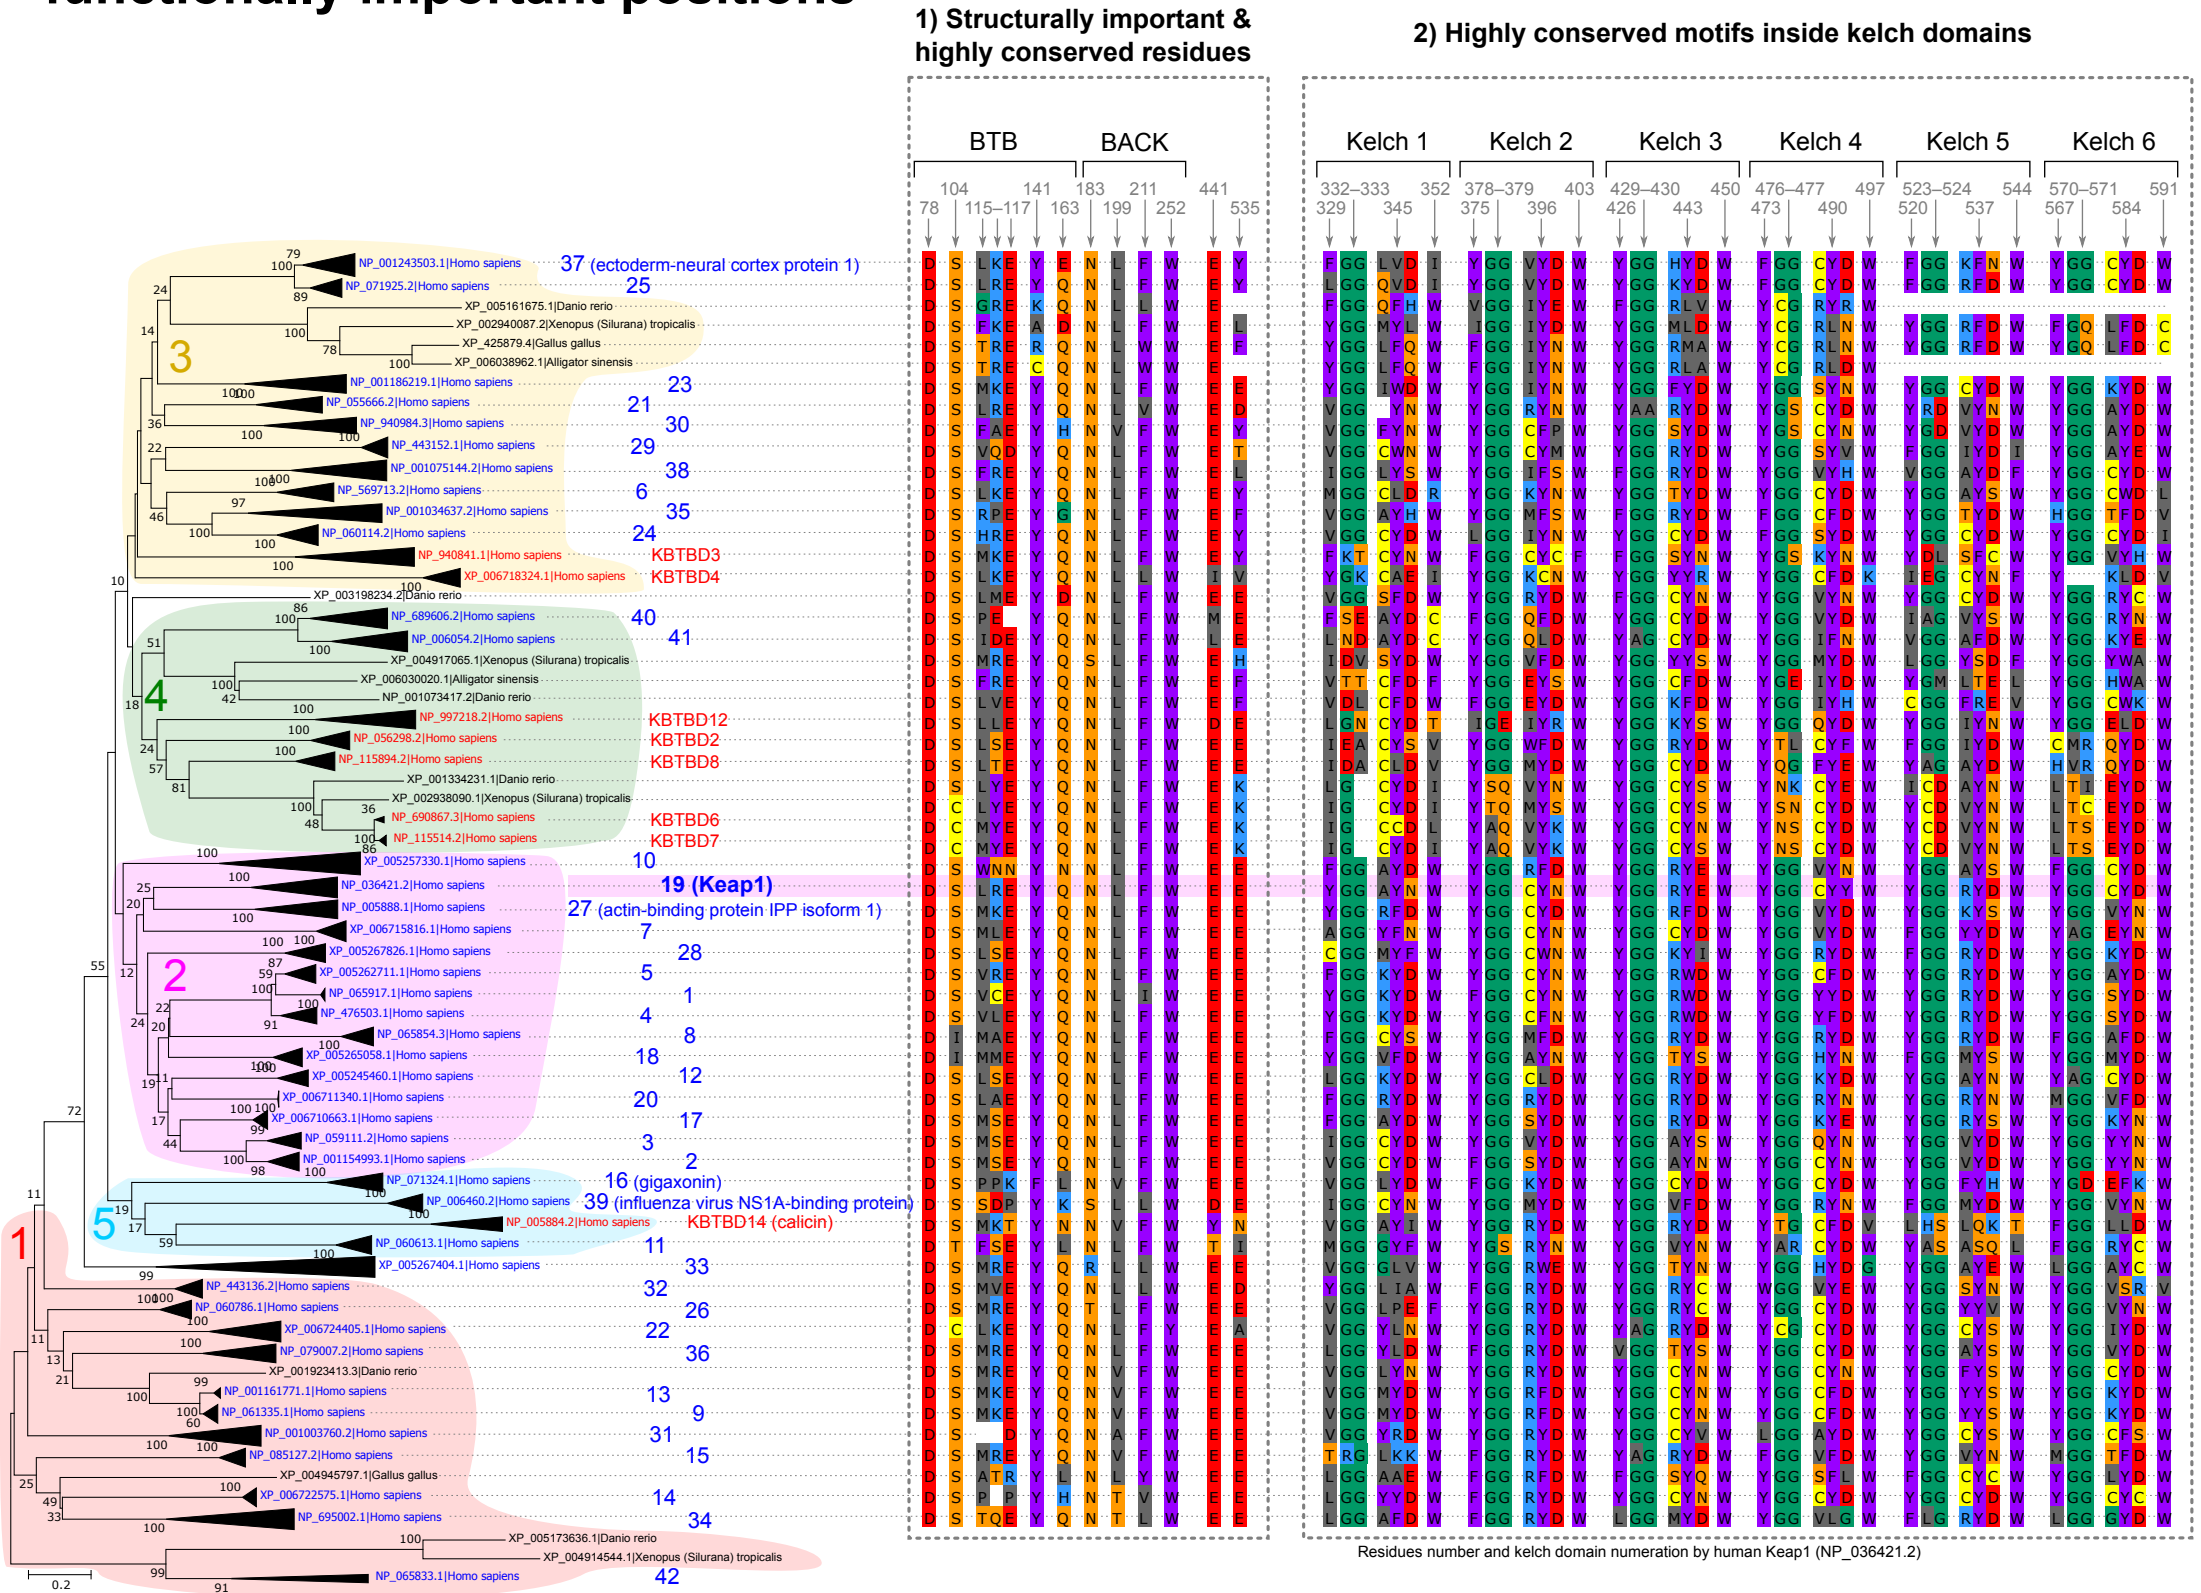

**Figure S4. Multiple alignment of Keap1 proteins from genomes of 9 selected *Vertebrata* species.** Residues which are marked in the **Figure 3** on the main text are marked in the CYS\_IMPORTANT\_RESIDUES row (X marks positions poorly aligned between different KLHL proteins, C marks aligned positions). Structurally important residues which are depicted in **Figure S3** are marked in the STRUCTURE\_AND\_FUNCTION row. Regions where good multiple alignment exists between different KLHL proteins and which were chosen for the phylogenetic tree construction are marked in the BLOCKS row. Domain boundaries as predicted by Pfam domain models for human sequence are given in the FORMULA row. Alignment was visualized in GeneDoc software (<http://nrbsc.org/gfx/genedoc>).

```

CYS_IMPORTANT_RESIDUES      : -----XX-----X-----X-----C-----
STRUCTURE_AND_FUNCTION      : -----Z-----
NP_036421.2|Human           : MQPAPPPPSGAACCRFLPLQSQPPGAGDAVMMASTECKAEVTPSQ-HGNRTFSYTLLEDHTKQAFGIMNELLSQQLCDVTLQVK
NP_001103775.1|Mouse        : MQPAPPLSGAPRSSQFLPLWSKCPGAGDAVMMASTECKAEVTPSQ-DGNRTFSYTLLEDHTKQAFGVMNELLSQQLCDVTLQVK
NP_001094612.1|Cattle       : MQPAPPPPSGAATQFLPLRSQPPGAGDTAMMASTECKAEVTPSQ-HGNRTFSYTLLEDHTKQAFGIMNELLSQQLCDVTLQVK
XP_036702860.1|Blue_whale  : MQLPAPPPPSGAATQFLPLRSQPPGAGDTVMMASTECKAEVTPSQ-HGNRTFSYTLLEDHTKQAFGIMNELLSQQLCDVTLQVK
XP_004865558.1|Naked_mole_rat : MQPAPPPPSRARARSRLPLHSQCPGAGDTVMMASTECKAEVTPSQ-DGNRTFSYTLLEDHTKQAFGIMNELLSQQLCDVTLQVK
XP_006023504.1|Chinese_alligator : -----MVAPECCQAEVTPSP-AGPRSFSTYTLDEHPCCALAIMNELLSQQLCDVTLQVK
NP_001008024.1|Western_clawed_frog : -----MVAPECCQAEVTPSHSNGNRQFQYSLADHTNQAFQIMNELLSQQLCDVTLQVK
NP_001106948.1|Danio_rerio  : -----MLAAAMTECKAEVTPSASNGHVFSTYTLSSHTAAAFAIMNELRRRFLQLCDVTLQVK
NP_878284.2|Danio_rerio     : -----MICPRKKRPICKDEDFSAIVVPSM-RGHGYLYTVSSHPSSALQNMDELRRHHEMLCDLVLTVT
XP_002940707.2|Western_clawed_frog : -----MAISHAFFNQNSMLCPKRRKKQPCLNCTAIAVPSM-KGHGYLYTVTINHTSAFEKMDMRFNLLCDVLLTFS
BLOCKS                      : -----BBBBBBBBBBBBBBBB-----
FORMULA                      :

```

```

CYS_IMPORTANT_RESIDUES      : -----C-----CCCC-----Z-----C-----C-----
STRUCTURE_AND_FUNCTION      : -----Z-----Z-----Z-----Z-----
NP_036421.2|Human           : YQLA-PAAQFMAHKVVLASSSPVFKAMFTN-GLREQGMEVVSIGIHPKVMRLIEFFAYTASISMGEKCVLVMNGAVMYQIISV
NP_001103775.1|Mouse        : YELI-PAAQFMAHKVVLASSSPVFKAMFTN-GLREQGMEVVSIGIHPKVMRLIEFFAYTASISVGEKCVLVMNGAVMYQIISV
NP_001094612.1|Cattle       : YQLA-PAAQFMAHKVVLASSSPVFKAMFTN-GLREQGMEVVSIGIHPKVMRLIEFFAYTASISMGEKCVLVMNGAVMYQIISV
XP_036702860.1|Blue_whale  : YQLA-PAAQFMAHKVVLASSSPVFKAMFTN-GLREQGMEVVSIGIHPKVMRLIEFFAYTASISMGEKCVLVMNGAVMYQIISV
XP_004865558.1|Naked_mole_rat : YELI-PTAQFMAHKVVLASSSPVFKAMFTT-GLREQGMEVVSIGIHPKVMRLIEFFAYTASISMGEKCVLVMNGAVMYQIISV
XP_006023504.1|Chinese_alligator : YRLA-PPADFQAHKVVLASSSPVFKAMFTA-GLREQGMEVVPICGIHPKVMRLIEFFAYTASIAVGERCVLVMNGAVMYQIISV
NP_001008024.1|Western_clawed_frog : YNL--VQDEFVAKIVLASSSPVFKAMFTN-GLRCGMEVTVITIGVHPKVMRLIEFFAYTASISVGEKCVI VMNGAVMYQIISV
NP_001106948.1|Danio_rerio  : YCPLTHVDFVAKIVLASSSPVFKAMFTN-GLRCGMEVVPICGIHPKVMRLIEFFAYTASISVGEKCVI VMNGAVMYQIISV
NP_878284.2|Danio_rerio     : YKL--KIVDFKVKHVLVAASSPYFKAMFTS-NFKCHASAEVTLREVCPQVISRLIEFFAYTSRITVGETCVLVLLTAMRYQMEEV
XP_002940707.2|Western_clawed_frog : YNL--KEEDFHVHKIVLASCSPFKAMFTN-NFKCHAREVITIKICPKVMRLIEFFAYTSRITVGEKCVLVLLAAMRYQMEEV
BLOCKS                      : -----BBBBBBBBBBBBBBBBBBBBBBBBBBBBBBBBBBBBBBBBBBBBBBBBBBBBBBBBBBBBBBBBBBBBBBBBBBBB-----
FORMULA                      :

```

```

CYS_IMPORTANT_RESIDUES      : -----CC-----C-----C-----C-----CCC-----C-----C-----
STRUCTURE_AND_FUNCTION      : -----Z-----Z-----Z-----Z-----
NP_036421.2|Human           : VRACSEFLVQQLPSNAIGIANFAQIGCVTLQAREYIYMHFGE---VAQSEFFFNLSHCQLVTLISRDELNVRCSEVFHA
NP_001103775.1|Mouse        : VRACSEFLVQQLPSNAIGIANFAQIGCTELQAREYIYMHFGE---VAQSEFFFNLSHCQLATLISRDELNVRCSEVFHA
NP_001094612.1|Cattle       : VRACSEFLVQQLPSNAIGIANFAQIGCTELQAREYIYMHFGE---VAQSEFFFNLSHCQLVTLISRDELNVRCSEVFHA
XP_036702860.1|Blue_whale  : VRACSEFLVQQLPSNAIGIANFAQIGCTELQAREYIYMHFGE---VAQSEFFFNLSHCQLATLISRDELNVRCSEVFHA
XP_004865558.1|Naked_mole_rat : VRACSEFLVQQLPSNAIGIANFAQIGCTELQAREYIYMHFGEPLQVQVQSEFFFNLSHCQLATLISRDELNVRCSEVFHA
XP_006023504.1|Chinese_alligator : VRACAFFLAQQLPSNAIGIANFAQICSESLQAREYIYRHFGE---VAQSEFFFNLSHCQLVTLISRDELNVRCSEVFHA
NP_001008024.1|Western_clawed_frog : VRACCFLLIQQLPSNAIGIATFAQIGCHSLQAREYIYMHFGE---VAQSEFFFNLSHCQLVNLVSRDELNVRCSEVFHA
NP_001106948.1|Danio_rerio  : VQACCFFLVQQLPSNAIGIATFAQIGCTELQAREYIYMHFGE---VATQSEFFFTLSHCQLVTLISRDELNVRCSEVFHA
NP_878284.2|Danio_rerio     : AKACCFLLMKNLPSNVIGISREAEIGCTELQAREYIYMHFGE---VTKEEFFSLSHCQLLISQLSLKVLCESEVYKA
XP_002940707.2|Western_clawed_frog : AKACSEFLVKHLASNVIGISNFAQIGCHSLQAREYIYMHFGE---VTNDEEFFLSLSHCQLLVLSQLSLNVLCESEVYKA
BLOCKS                      : BBBBBBBBBBBBBBBBBBBBBBBBBBBBBBBBBBBBBBBBBBBBBBBBBBBBBBBBBBBBBBBBBBBBBBBBBBBBB-----B
FORMULA                      :

```



CYS\_IMPORTANT\_RESIDUES : C-----X-----X-----X-----X-----

STRUCTURE\_AND\_FUNCTION : --Z-----Y--GG

NP\_036421.2|Human : CINWVKYDCEQRREFYVQALLRAVRCHSLTPNFIQMQLQKCEILQSSSRCKDYLVKIFQELTLHKPTQVMPCRAPKVGRLIYTAGG

NP\_001103775.1|Mouse : CILWVKYDCPQRREFYVQALLRAVRCHALTPRFILQTLQKCEILQALARCKDYLVQIFQELTLHKPTQAVPCRAPKVGRLIYTAGG

NP\_001094612.1|Cattle : CINWVKYDCEQRREFYVQALLRAVRCHSLTPHFIQMQLQKCEILQSSSRCKDYLVKIFQELTLHKPTQVMPCRAPKVGRLIYTAGG

XP\_036702860.1|Blue\_whale : CINWVKYDCEQRREFYVQALLRAVRCHSLTPHFIQMQLQKCEILQSSSRCKDYLVKIFQELTLHKPTQVMPCRAPKVGRLIYTAGG

XP\_004865558.1|Naked\_mole\_rat : CINWVKYDCEQRREFYVQALLRAVRCHALTPHFIQMQLQKCEILQSSSRCKDYLVQIFQELTLHKPTPAMPKCRAPKVGRLIYTAGG

XP\_006023504.1|Chinese\_alligator : CILWVKYDCASRRPFYVQALLRAVRCHALSPGFIQLQLRCEVLSLTRCQDYLAQIFQDLTLHKPTQLPSRTPKVGQLIYAVGG

NP\_001008024.1|Western\_clawed\_frog : CINWVKYDCFNRRPFYVQALLRAVRCHSLTPNFIQLQLRCEILKGSRCQDYLSQIFQDLTLHKPTLPQLGRIPNVQFIYVAGG

NP\_001106948.1|Danio\_rerio : CVAVVQYDREERPFYVQALLQAVRCHSLTPHFIQLRHFHW--LAQSKDYLSQIFRDLTLHKPTKVIPLRTPKVPQLIYTVGG

NP\_878284.2|Danio\_rerio : CILWVWDASFSAQYFHALLNAVHLYALPPTFLKFLQSCPIILSKANSCKDFLSKIFHFMALRKPLPPTPHRG---TQLIYIAGG

XP\_002940707.2|Western\_clawed\_frog : CLKWMQWDLNNSAQYFHALLNAVHLYSLPAKFLIQLKKCPILSKENRCFVYLSKIFQEMCLHKPLRFPKQRC---NQLIYVAGG

BLOCKS : BBBBBBBBBBBB-----

FORMULA : 1

CYS\_IMPORTANT\_RESIDUES : -----X-----X-C-----C-----C-----

STRUCTURE\_AND\_FUNCTION : B-----W-----Y--GG-B-----C-----C-----B-----

NP\_036421.2|Human : YFRQSLSYLEAYNPSFGTWLRL-A-LQVPRSSLAGCVVGGLLMVAVGGRNNSPFCNTDSSALCYNPMTNQWSPCAPMSVPRNRITG

NP\_001103775.1|Mouse : YFRQSLSYLEAYNPSNGSWLRL-A-LQVPRSSLAGCVVGGLLMVAVGGRNNSPFCNTDSSALCYNPMTNQWSPCASMVSVPNRITG

NP\_001094612.1|Cattle : YFRQSLSYLEAYNPSFGTWLRL-A-LQVPRSSLAGCVVGGLLMVAVGGRNNSPFCNTDSSALCYNPMTNQWSPCAPMSVPRNRITG

XP\_036702860.1|Blue\_whale : YFRQSLSYLEAYNPSFGTWLRL-A-LQVPRSSLAGCVVGGLLMVAVGGRNNSPFCNTDSSALCYNPMTNQWSPCAPMSVPRNRITG

XP\_004865558.1|Naked\_mole\_rat : YFRQSLSYLEAYNPSFGTWLRL-A-LQVPRSSLAGCVVGGLLMVAVGGRNNSPFCNTDSSALCYNPMTNQWSPCAPMSVPRNRITG

XP\_006023504.1|Chinese\_alligator : YYRQSLGFLEAYNPHDGAWLRL-A-LVPRSSLAGCAVVGGLLMVAVGGRNNSPFCNTDSSALCYNPMTNQWSPCAPMSVPRNRITG

NP\_001008024.1|Western\_clawed\_frog : YYRQSLSFLEAYNPVFGEWLTL-ASLMPRSSLAGCVLGGFLYAVGGRNNAPCNKDSGALCYNPMNNQWSPCAAMSVPRNIVG

NP\_001106948.1|Danio\_rerio : YFRQSLSFLEAFNPSCGAWLRL-A-LQVPRSSLAGACVISGLLMVAVGGRNNSPFCNMSHTLRCYNPMNNCWRPCAHMSVPRNRITG

NP\_878284.2|Danio\_rerio : YKQSLTLFAFPHKNVWLKL-SMMSPCSFLACVILFGLLYTVGGRNLSLQNTESGSLSCYNPMTNQWTQLAPLNTPRNFVG

XP\_002940707.2|Western\_clawed\_frog : YLQNSLSSMDAFNPQTGEWIKL-A-MLSPRSSFLACIVSGFLYAVGGRNNSCQNTDSSLSEFNPTNQWASAPMNVPRNFVG

BLOCKS : -----BBBBBBBBBBBBBB-----BBBBBBBBBBBBBBBBBBBBBBBBBB-----

FORMULA : 1 2 2 3

CYS\_IMPORTANT\_RESIDUES : -----X-----C-----X-----C-----

STRUCTURE\_AND\_FUNCTION : -----Y--GG-B-----W-----Y--GG-B-----W-----

NP\_036421.2|Human : VEVIQGHIIYAVGSGHGCIIHNSVRYEPERDEWHLVAPMLTRRIGVGVAVLNLLYAVGGFDGTRNLNSAECYYPERNWRMITA

NP\_001103775.1|Mouse : VEVIQGHIIYAVGSGHGCIIHNSVRYEPERDEWHLVAPMLTRRIGVGVAVLNLLYAVGGFDGTRNLNSAECYYPERNWRMITP

NP\_001094612.1|Cattle : VEVIQGHIIYAVGSGHGCIIHNSVRYEPERDEWHLVAPMLTRRIGVGVAVLNLLYAVGGFDGTRNLNSAECYYPERNWRMITP

XP\_036702860.1|Blue\_whale : VEVIQGHIIYAVGSGHGCIIHNSVRYEPERDEWHLVAPMLTRRIGVGVAVLNLLYAVGGFDGTRNLNSAECYYPERNWRMITP

XP\_004865558.1|Naked\_mole\_rat : VEVIQGHIIYAVGSGHGCIIHNSVRYEPERDEWHLVSPMLTRRIGVGVAVLNLLYAVGGFDGTRNLNSAECYYPERNWRMITP

XP\_006023504.1|Chinese\_alligator : VEVIQGLIYAVGSGHGCIIHNSVRYEPERDEWHLVAPMLTRRIGVGVAVLNLLYAVGGFDGTRNLNSAECYYPERNWRMITP

NP\_001008024.1|Western\_clawed\_frog : AEVIQGIYAVGSGHGCIIHNSVRYEPERDEWHLVSPMLTRRIGVGVAVLNLLYAVGGFDGTRNLNSAECYYPERNWRMITP

NP\_001106948.1|Danio\_rerio : VEVIQMIYAVGSGHGCIIHNSVRYEPERDEWHLVSPMLTRRIGVGVAVLNLLYAVGGFDGTRNLNSAECYYPERNWRMITP

NP\_878284.2|Danio\_rerio : VEVIQSIYAVGSGHGCIIHNSVRYEPERDEWHLVAPMSVARLQAGVACGGCLYVVGFDGTRNLNSAECYYPERNWRMITP

XP\_002940707.2|Western\_clawed\_frog : VAIQGAIIYAGSGSGSHHKSIVKYDPDNRWTHVAPMPTARIGAGVVAACRGLYVVGFDGTRNLNSAECYYPERNWRMITP

BLOCKS : -----

FORMULA : 3 4

CYS\_IMPORTANT\_RESIDUES : -----C-----C-----C-----  
STRUCTURE\_AND\_FUNCTION : -----Y--GGB-----Z-----W-----Y-----GGB-----  
NP\_036421.2|Human : MNTIRSGAGVCVLHNCIYAAAGGYDQQLNSVRYDVEETETWTFVAPMKHRRSALGITVHQGRITYVL-----GGYDGH  
NP\_001103775.1|Mouse : MNTIRSGAGVCVLHNCIYAAAGGYDQQLNSVRYDVEETETWTFVAPMRHRRSALGITVHQGRITYVL-----GGYDGH  
NP\_001094612.1|Cattle : MNTIRSGAGVCVLHNCIYAAAGGYDQQLNSVRYDVEETETWTFVAPMKHRRSALGITVHQGRITYVL-----GGYDGH  
XP\_036702860.1|Blue\_whale : MNTIRSGAGVCVLHNCIYAAAGGYDQQLNSVRYDVEETETWTFVAPMKHRRSALGITVHQGRITYVL-----GGYDGH  
XP\_004865558.1|Naked\_mole\_rat : MNTIRSGAGVCVLHNCIYAAAGGYDQQLNSMRYDVEETETWTFVAPMKHRRSALGITVHQGRITYVL-----GGYDGH  
XP\_006023504.1|Chinese\_alligator : MNTIRSGAGTCALNNCLYAMGGYDGTQQLNSTERYDVEETETWTFVAPMRHRRSALGVTTYQGRITYVL-----GGYDGH  
NP\_001008024.1|Western\_clawed\_frog : MNIVRSGAGACALTSVYAMGGYDGTQQLNSVRYDVEETETWTFVAPMRHRRSALGVTVHQGRITYVL-----GGYDGS  
NP\_001106948.1|Danio\_rerio : MNTVRSAGVCALENYIYVMGGYDGTNQLNTVRYDVEETETWTFVAPMRHRRSALGVTTTHGRITYVL-----GGYDGN  
NP\_878284.2|Danio\_rerio : MNTVRSGLGVVCMNYLYAVGGYDGTQQLRTMRYNITREVVWPMASMNHCRSANGVSVYQCKITFVL-----GGFNQG  
XP\_002940707.2|Western\_clawed\_frog : MNTIRSGAGVVALNLYLYAVGGYDGTNQLTSVRYNIRNYWAMAPMKHRRSANGLTVHQGRITYALGKELKYELNYNVGGFNAG  
BLOCKS :  
FORMULA : 4 5 5 6

CYS\_IMPORTANT\_RESIDUES : -----C-----X-----X-X-----  
STRUCTURE\_AND\_FUNCTION : -----W-----  
NP\_036421.2|Human : TFLSVFCYDPTTWSEVTRMTSGRSGVGVAVTMPCKRKQIQQNCTC-----  
NP\_001103775.1|Mouse : TFLSVFCYDPTSTTWSEVTRMTSGRSGVGVAVTMPCKRKQIQQNCTC-----  
NP\_001094612.1|Cattle : TFLSVFCYDPTTWSEVTRMTSGRSGVGVAVTMPCKRKQIQQNCTC-----  
XP\_036702860.1|Blue\_whale : TFLSVFCYDPTTWSEVTCMTSGRSGVGVAVTMPCKRKQIQQNCTC-----  
XP\_004865558.1|Naked\_mole\_rat : TFLSVFCYDPTTWSEVTRMTSGRSGVGVAVTMPCKRKQIQQNCTC-----  
XP\_006023504.1|Chinese\_alligator : TFLSVFCYDPTATTWSEVTCMTSGRSGVGVAVTMPCKR---QPGCHC  
NP\_001008024.1|Western\_clawed\_frog : TFLGVFCYNPATITWTEVTQMTSGRSGVGVAITMPCKRQPCGGGLFPERVKDGSKDKKCCFSSHTKK  
NP\_001106948.1|Danio\_rerio : TFLSVFCFLPTTSWTEVTMTSGRSGVGVAVTMPCHK---LIPCCQ  
NP\_878284.2|Danio\_rerio : GFLSSVFCYCPASNVITLVTMPVGRSGMGVAVTMPCPGILPDEEEVDEM  
XP\_002940707.2|Western\_clawed\_frog : GFLSSVFCYCPDENWTEVTVMPTGCSGMSVAVTMPCPQLCTNREN-----  
BLOCKS :  
FORMULA : 6

Figure S5. Short version of the phylogenetic tree of the KLHL proteins with the Nrf2 binding motif mapped onto it

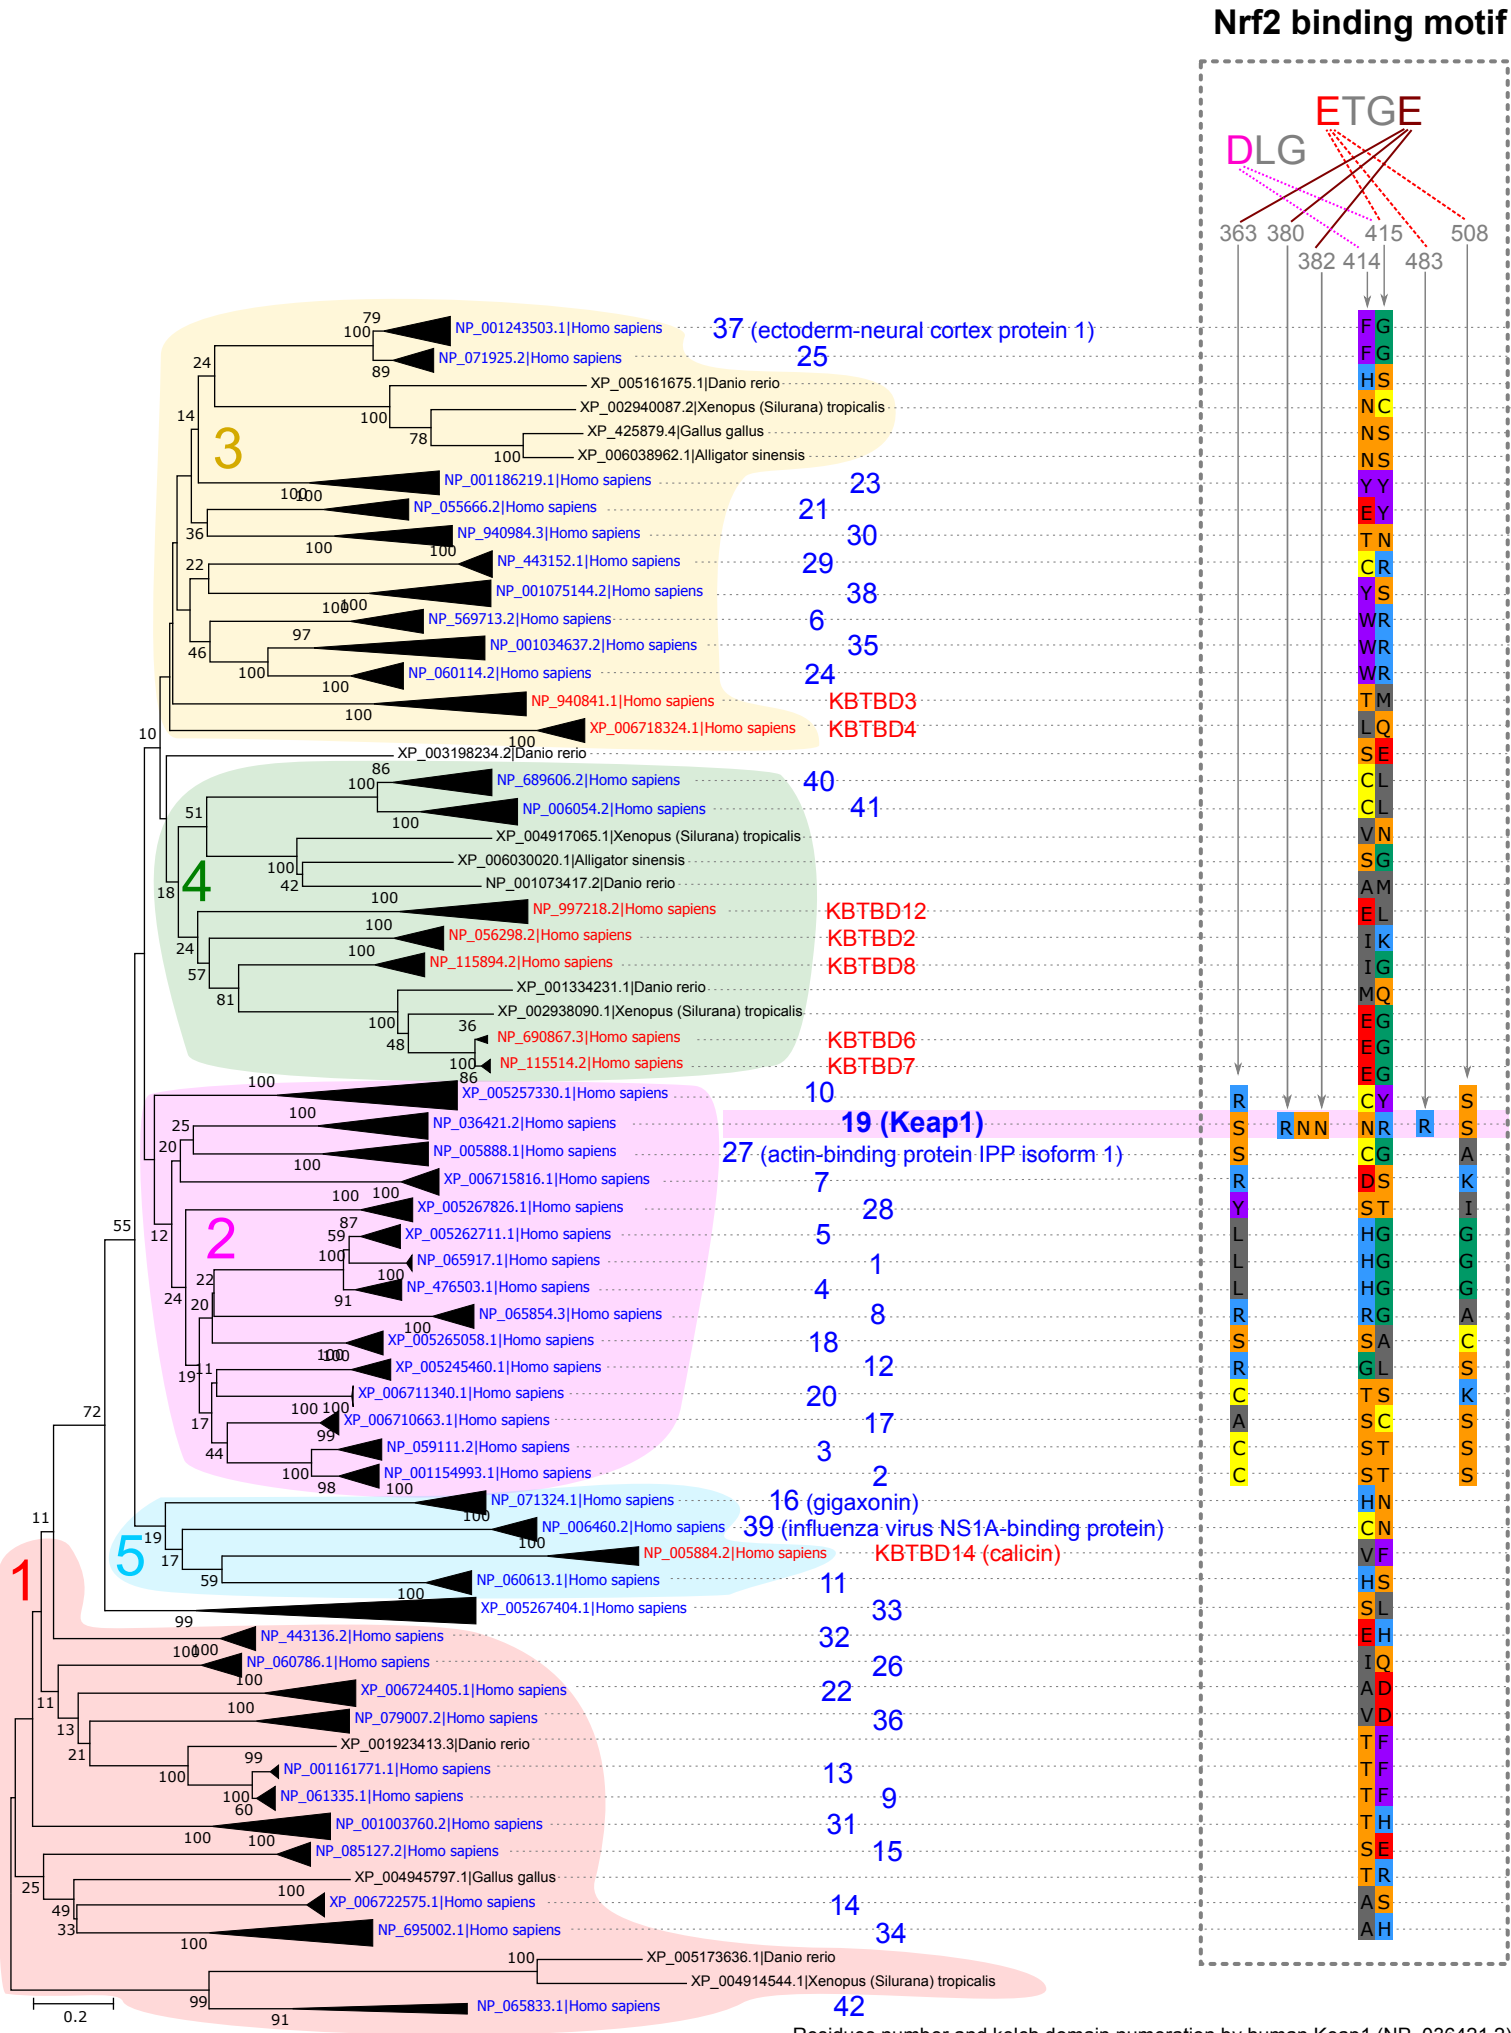



**Figure S6.** Comparison between domain borders produced by the Pfam profile HMM search (top) and those annotated in the Uniprot/SwissProt database (bottom) for human Keap1: (A) BTB and BACK domains, (B) two Kelch domains.

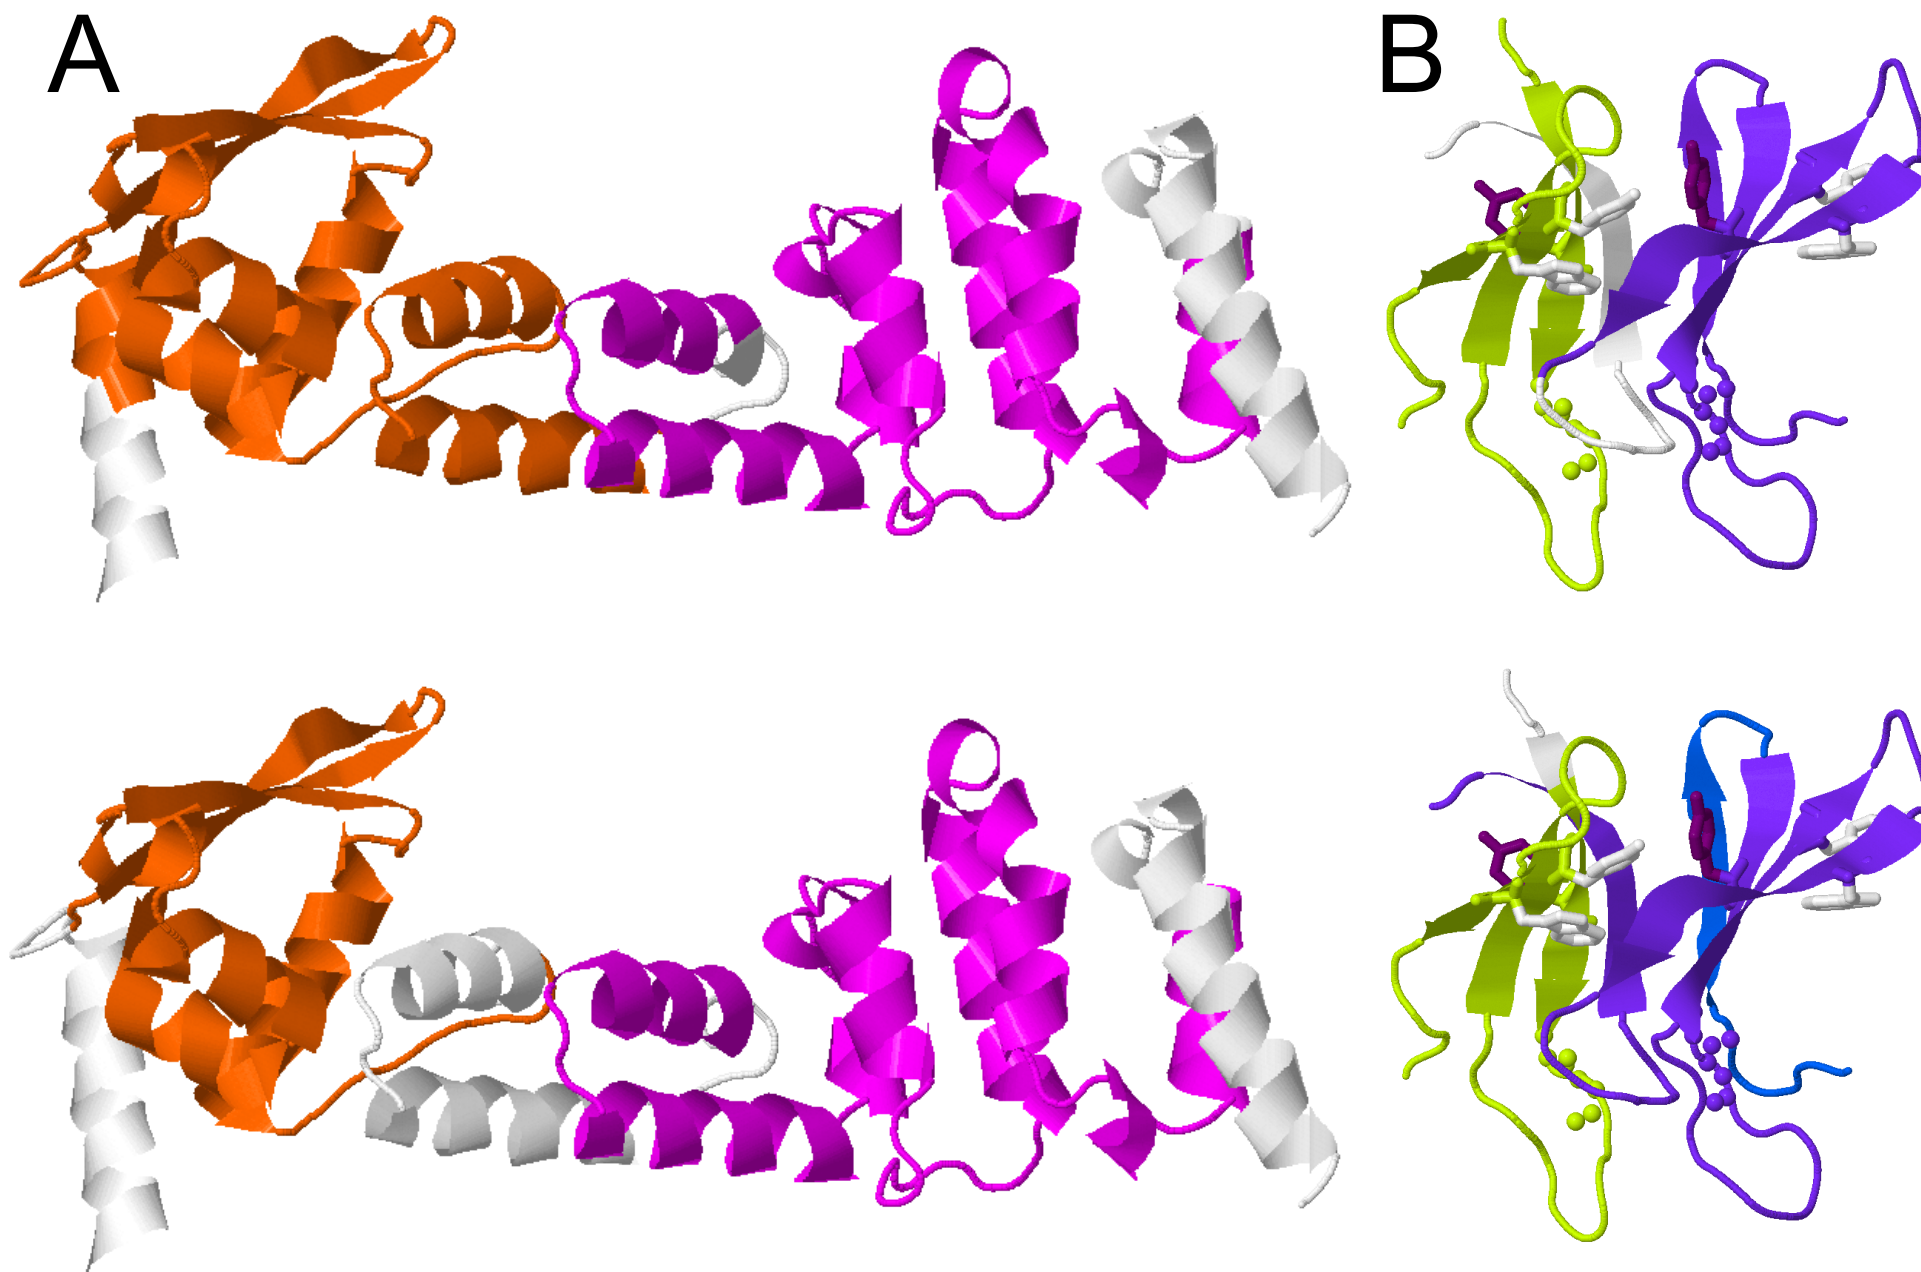

Supplement: s1 [file s1]
