# Supplementary material for: Regulation of Cell Proliferation and Nrf2-Mediated Antioxidant Defense: Conservation of Keap1 Cysteines and Nrf2 Binding Site in the Context of the Evolution of KLHL Family
Source: MDPI journal article supplement (doi:10.3390/life13041045), 2023-04-19
Supplement: s1 [file s1]

## Supplementary file 2

to the article: “Regulation of Cell Proliferation and Nrf2-Mediated Antioxidant Defense: conservation of Keap1 cysteines and Nrf2 binding site in the context of the evolution of KLHL Family”

**Analysis of conservation of several important positions in Keap1.** The best known conserved elements of these proteins are the double glycine repeats of Kelch domains (from the presence of which the entire region is sometimes referred to in the literature as DGR, double glycine repeat), present in many proteins from humans to mosquitoes and *Drosophila*. However, tryptophan, located second from the beginning of the  $\beta$ -strand D ( $\beta$ D) in all six lobes of the Kelch domains, turned out to be an even more conservative amino acid in the entire KLHL protein family. Tryptophan ( $\beta$ D), along with a pair of glycines present at the end of the  $\beta$ B chain and tyrosine residues ( $\beta$ C), regulates the hydrophobic packing between the blades.

In two cases (in Kelch2 (W403) and Kelch3 (W450)) it occurs in all 42 human KLHL proteins (no amino acid repeats this record); in 41 cases in Kelch5 (W544); in 40 - in Kelch4 (W497), however, only 34 times in Kelch1 (W352) and Kelch6 (W591). Trp losses in Kelch1 (W352) are evenly distributed between the KLHL clades: one in clade I, two in clade II, and three in clade 3 and two in clade 4 (See Table S2 below).

The occurrence of glycine within the GG repeats following  $\beta$ B strand is also exceptionally high: 40 out of 42 in Kelch1 (G332 and G333); 41/42 and 40/42 in Kelch2 (G378 and G379); 38/42 and 41/42 in Kelch3 (G429 and G430); 40/42 and 39/42 in Kelch4 (G476 and G477); but then decreases slightly: 39 out of 42 and 38/42 in Kelch5 (G523 and G524, respectively) and especially in Kelch6 - 36/42 and 35/42 (respectively for G570 and G571).

In Kelch1, one G is missing in KLHL42 (clade 1) and in KLHL40 and KLHL41 (clade 4), and in KLHL40 and 41 this motif is generally strongly disturbed. In Kelch2 there is no one G in KLHL11 (clade 4). Kelch3 completely lacks a GG repeat in KLHL21 (clade 3) and lacks one G in KLHL15 and KLHL22 (clade 1) and KLHL41 (clade 4). In Kelch4, the GG repeat is completely absent in the KLHL11 (clade 5) and a single G is missing in the KLHL22 (clade 1) and KLHL30 (clade 3). There is no GG repeat in Kelch5 for KLHL21 (clade 3) and KLHL11 (clade 5) and only single G is observed in KLHL34 (clade 1). In Kelch6 the pair of glycines is missing in KLHL25, KLHL29, KLHL37 and KLHL38 (clade 3), as well as KLHL42 (clade 1), KLHL16 (clade 5) and in KLHL7 and KLHL12 (clade 2).

**Table S2. Detailed description of conservation of cysteines and other functionally and structurally important residues in Keap1 (KLHL19) and other members of the KLHL family.** Asterisk sign \* marks residues which have basic residues in their closest neighbors. Chamsa-Chaban cysteine (position 208) which occurs in Keap1 of several long-living species which are tolerant to oxidative stress is marked with double asterisk \*\*. Numbering in the first column is given only for the cysteine residues which are present in human Keap1. Ultraconservative positions, i.e. occurring in more than 66% of the sample, are colored yellow. KLHL33 protein which according to our analysis does not belong to any clade specifically is considered for simplicity a member of clade 1 and is marked with the dagger † sign.

| # of C | Domain     | Residue         | Neighbors of Cys residues / comments for other residues | Conserved in human KLHL proteins | KLHL family                 |                                                     |                               |          |                 |
|--------|------------|-----------------|---------------------------------------------------------|----------------------------------|-----------------------------|-----------------------------------------------------|-------------------------------|----------|-----------------|
|        |            |                 |                                                         |                                  | Clade 1                     | Clade 2                                             | Clade 3                       | Clade 4  | Clade 5         |
|        | <b>NTR</b> | <b>[1–66]</b>   |                                                         |                                  |                             |                                                     |                               |          |                 |
| 1      | NTR        | C13             | A(C13)C                                                 | 1                                | --                          | In Keap1 (KLHL19) only                              | --                            | --       | --              |
| 2      | NTR        | C14*            | C(C14) <b>R</b>                                         | 2                                | --                          | <b>-19</b>                                          | --                            | --       | --              |
| 3      | NTR        | C23             | Q(C23)P                                                 | 3                                | --                          | <b>-19, -27</b>                                     | --                            | --       | --              |
| 4      | NTR        | C38*            | E(C38) <b>K</b>                                         | 4                                | KLHL32                      | <b>-5, -19</b>                                      | KLHL35                        | --       | --              |
|        | <b>BTB</b> | <b>[67–178]</b> |                                                         |                                  |                             |                                                     |                               |          |                 |
| 5      | BTB        | C77             | L/F(C77)D                                               | 24                               | -9, -13, -14, -31, -34, -36 | all clade (1-5; -7, -8, -10, -12, -17-20, -27, -28, | --                            | --       | KLHL11; -16;-39 |
|        | BTB        | D78             |                                                         | 41                               |                             |                                                     |                               |          |                 |
|        | BTB        | C95             | P/S/ <b>H</b> (C95) <b>H</b>                            | 12                               | -14                         | -8                                                  | -6, -23-25, -30, -35, -37, 38 | -40, -41 | --              |

|  |     |                  |                                                                                                               |       |                         |                                 |                    |          |    |
|--|-----|------------------|---------------------------------------------------------------------------------------------------------------|-------|-------------------------|---------------------------------|--------------------|----------|----|
|  | BTB | H96              |                                                                                                               | 40    |                         |                                 |                    |          |    |
|  | BTB | K97/R            |                                                                                                               | 12/29 |                         |                                 |                    |          |    |
|  | BTB | L100             |                                                                                                               | 39    |                         |                                 |                    |          |    |
|  | BTB | A101             |                                                                                                               | 33    |                         |                                 |                    |          |    |
|  | BTB | C102             | A(C102)G/S/V/C                                                                                                | 4     | -33†, -34               | -8, -39                         | --                 | --       | -- |
|  | BTB | C103             | A/S/V(C103)S                                                                                                  | 18    | -14, -26, -31, -32, -36 | -2, -3, -10, -12, -17, -20, -39 | -23, -24, -29, -37 | -40, -41 | -- |
|  | BTB | S104             |                                                                                                               | 38    |                         |                                 |                    |          |    |
|  | BTB | Y106             |                                                                                                               | 39    |                         |                                 |                    |          |    |
|  | BTB | F107             |                                                                                                               | 40    |                         |                                 |                    |          |    |
|  | BTB | Residues 108-117 | <u>Belongs to the <math>\alpha 3</math>/<math>\alpha 3.1</math> structure; important for the Cul3 binding</u> |       |                         |                                 |                    |          |    |
|  | BTB | K108/R           | <u>Belongs to the <math>\alpha 3</math>/<math>\alpha 3.1</math> structure; important for the Cul3 binding</u> | 6/18  |                         |                                 |                    |          |    |
|  | BTB | F111             |                                                                                                               | 36    |                         |                                 |                    |          |    |
|  | BTB | E117             | <u><math>\phi</math>-xE motif; important for the Cul3 binding</u>                                             | 36    |                         |                                 |                    |          |    |
|  | BTB | Y141             | Important for the                                                                                             | 40    |                         |                                 |                    |          |    |

|   |             |           |                                                                              |    |                                        |                                                          |                                            |                         |           |
|---|-------------|-----------|------------------------------------------------------------------------------|----|----------------------------------------|----------------------------------------------------------|--------------------------------------------|-------------------------|-----------|
|   |             |           | dimerization process and catalytic activity                                  |    |                                        |                                                          |                                            |                         |           |
| 6 | BTB         | C151*     | <b>K/D(C151)V</b>                                                            | 2  | -26                                    | -19                                                      | --                                         | --                      | --        |
|   | BTB         | V152      |                                                                              | 26 |                                        |                                                          |                                            |                         |           |
|   | BTB         | A159      |                                                                              | 37 |                                        |                                                          |                                            |                         |           |
|   |             | C160      | A(C160)Q                                                                     | 7  | --                                     | -1, -4, -5, -8, -12, 18                                  | -21                                        | --                      | --        |
|   | BTB         | Q163      | Important for the dimerization process and catalytic activity                | 34 |                                        |                                                          |                                            |                         |           |
| 7 | BTB         | C171      | A(C171)/S/C/G/V/X                                                            | 40 | -9, -13-15, -22,-26, -31, -34, -36     | all clade (1-5; -7, -8, -10, -12, -17-20, -27, -28, -39) | -6, -21, -23, -24, -29, -30, -35, -37, -38 | all clade (-40, -41)    | -11, -16, |
|   | BTB         | C172      | C(C172)E/D/S                                                                 | 16 | -15, -22, -36                          | -1-3, -5, -8, -10, -12, -17, -18, -20, -27, -28          | --                                         | --                      | -16       |
|   | BTB         | L175      |                                                                              | 41 |                                        |                                                          |                                            |                         |           |
|   |             | N183      | Belongs to the 3-box residues (181–212) which is important for the catalysis | 39 |                                        |                                                          |                                            |                         |           |
|   | <b>BACK</b> | [185–285] |                                                                              |    |                                        |                                                          |                                            |                         |           |
|   | BACK        | C184      | N(C184)L/I/V/C/M/A                                                           | 36 | -9, -13, -15, -26, -31, -33†, -34, -42 | 1-5, -7, -8, -10, -12, -17, -18, -20, -27, -28, -39      | -6, -21, -23-25, -29, -30, -37, -38        | all clade IV (-40, -41) | -11, -16, |

|    |      |        |                                                                              |    |          |                                           |                              |          |    |
|----|------|--------|------------------------------------------------------------------------------|----|----------|-------------------------------------------|------------------------------|----------|----|
|    | BACK | L199   | Belongs to the 3-box residues (181–212) which is important for the catalysis | 34 |          |                                           |                              |          |    |
| 8  | BACK | C196   | G/S/Q/(C196)V/T/X                                                            | 22 | --       | -1-5, -7, -10, -12, -17, -18-20, -27, -28 | -21, -23, -25, -29, -37, -38 | -40, -41 | -- |
|    | BACK | C208** |                                                                              | 4  | --       | -8, -28                                   | -23                          | -40      | -- |
|    | BACK | F211   |                                                                              | 35 |          |                                           |                              |          |    |
|    | BACK | F220   |                                                                              | 35 |          |                                           |                              |          |    |
|    | BACK | L223   |                                                                              | 37 |          |                                           |                              |          |    |
| 9  | BACK | C226*  | <b>H</b> /(C226)Q                                                            | 2  | -32      | <b>-19</b>                                | --                           | --       | -- |
| 10 | BACK | C241*  | <b>R</b> (C241)E                                                             | 3  | -22, -36 | <b>-19</b>                                | --                           | --       | -- |
|    | BACK | E242   |                                                                              | 40 |          |                                           |                              |          |    |
|    | BACK | A248   |                                                                              | 29 |          |                                           |                              |          |    |
| 11 | BACK | C249   | A(C249)I                                                                     | 1  | --       | <b>-19</b>                                | --                           | --       | -- |
|    | BACK | D256   |                                                                              | 26 |          |                                           |                              |          |    |
| 12 | BACK | C257   | D(C257)E                                                                     | 1  | --       | <b>-19</b>                                | --                           | --       | -- |
|    | BACK | R260   |                                                                              | 36 |          |                                           |                              |          |    |
|    | BACK | R272   |                                                                              | 36 |          |                                           |                              |          |    |
| 13 | BACK | C273*  | <b>R</b> (C273) <b>H/R</b>                                                   | 2  | --       | <b>-19</b>                                | --                           | -40      | -- |

|    | IVR    | [286–323] |                  |    |                             |                                     |                             |    |     |
|----|--------|-----------|------------------|----|-----------------------------|-------------------------------------|-----------------------------|----|-----|
| 14 | IVR    | C288*     | K/A(C288)E       | 2  | -36                         | -19                                 | --                          | -- | --  |
|    | IVR    | C294      | L(C294)P/H/G     | 4  | --                          | -18                                 | -6, -21, -35                | -- | --  |
| 15 | IVR    | C297*     | R/X(C297)K/X     | 24 | -9, -13, -14, -26, -31, -36 | -1-5; -7, -8, -10, -12, -17-20, -28 | -3, -21, -24, -29, -35, -38 | -- | -11 |
|    | IVR    | C312      | R/A(C312)K/R/F   | 4  | --                          | --                                  | -25, 30, 35, 37             | -- | --  |
| 16 | IVR    | C319*     | P(C319)R/K       | 2  | --                          | -19, -27                            | --                          | -- | --  |
|    | Kelch1 | [324–358] |                  |    |                             |                                     |                             |    |     |
|    | Kelch1 | Y329      | βB               | 7  |                             |                                     |                             |    |     |
|    | Kelch1 | G332      |                  | 40 |                             |                                     |                             |    |     |
|    | Kelch1 | G333      |                  | 40 |                             |                                     |                             |    |     |
|    | Kelch1 | C338      | A/V/R(C338)L/K   | 4  | -32, -36                    | -28, -39                            | --                          | -- | --  |
|    | Kelch1 | C339      | M/S(C339)D/R     | 3  | --                          | -7                                  | -25, -37                    | -- | --  |
|    | Kelch1 | E343      | βC               | 16 |                             |                                     |                             |    |     |
|    | Kelch1 | C344      | E/D/T(C344)Y/L   | 8  | --                          | -2, -3, -8, -39                     | -6, -21, -24, -29           | -- | --  |
|    | Kelch1 | Y345      | βC               | 26 |                             |                                     |                             |    |     |
|    | Kelch1 | W352      | βD               | 34 |                             |                                     |                             |    |     |
|    | Kelch1 | S355      |                  | 15 |                             |                                     |                             |    |     |
|    | Kelch2 | [361–410] |                  |    |                             |                                     |                             |    |     |
|    | Kelch2 | G366      | βA               | 18 |                             |                                     |                             |    |     |
|    | Kelch2 | C366      | H/D/T/Q(C366)V/G | 6  | -14, -15, -26, -            | --                                  | --                          | -- | --  |

|    |               |                  |                          |    |              |                   |               |          |    |
|----|---------------|------------------|--------------------------|----|--------------|-------------------|---------------|----------|----|
|    |               |                  |                          |    | 31, -32, -36 |                   |               |          |    |
| 17 | Kelch2        | C368             | V/A/G(C368)A/V/T         | 5  | -34          | -1, -19           | -24, -35, -37 | --       | -- |
|    | Kelch2        | Y375             | $\beta$ B                | 30 |              |                   |               |          |    |
|    | Kelch2        | G378             |                          | 41 |              |                   |               |          |    |
|    | Kelch2        | G379             |                          | 42 |              |                   |               |          |    |
|    | Kelch2        | E394             | $\beta$ C                | 12 |              |                   |               |          |    |
| 18 | Kelch2        | C395             | E/D/W(C395)Y/F/L/W       | 8  | -1, -4, -5   | -7, -12, -19, -28 | -29, -30      | --       | -- |
|    | Kelch2        | Y396             | $\beta$ C                | 28 |              |                   |               |          |    |
|    | Kelch2        | W403             | $\beta$ D                | 42 |              |                   |               |          |    |
| 19 | Kelch2        | C406             | P(C406)A                 | 1  | --           | -19               | --            | --       | -- |
|    |               | A407             |                          | 20 |              |                   |               |          |    |
|    | <b>Kelch3</b> | <b>[412–456]</b> |                          |    |              |                   |               |          |    |
|    | Kelch3        | R413             |                          | 40 |              |                   |               |          |    |
|    | Kelch3        | C414             | <b>R</b> (C414)Y/G/N/R/L | 6  |              | -10, -27, -39     | -29           | -40, -41 | -- |
|    | Kelch3        | G417             | $\beta$ A                | 19 |              |                   |               |          |    |
|    | Kelch3        | Y426             | $\beta$ B                | 38 |              |                   |               |          |    |
|    | Kelch3        | G429             |                          | 41 |              |                   |               |          |    |
|    | Kelch3        | G430             |                          | 42 |              |                   |               |          |    |
| 20 | Kelch3        | C434             | G(C434)I                 | 1  | --           | -19               | --            | --       | -- |
|    | Kelch3        | C436             | S/T/R(C436)L/F           | 4  | --           | -8, -17, -20      | --            | 40       | -- |

|    |               |                  |                  |       |                                 |                    |                             |          |          |
|----|---------------|------------------|------------------|-------|---------------------------------|--------------------|-----------------------------|----------|----------|
|    | Kelch3        | E441             | $\beta$ C        | 38    |                                 |                    |                             |          |          |
|    | Kelch3        | Y443             | $\beta$ C        | 37    |                                 |                    |                             |          |          |
|    | Kelch3        | W450             | $\beta$ D        | 42    |                                 |                    |                             |          |          |
|    | <b>Kelch4</b> | <b>[459–504]</b> |                  |       |                                 |                    |                             |          |          |
|    | Kelch4        | G464/<br>A464    | $\beta$ A        | 11/19 |                                 |                    |                             |          |          |
|    | Kelch4        | C468             | V/G/S/A(C468)    |       | -42                             | --                 | -21, -24, -29, -<br>30, -35 | --       | --       |
|    | Kelch4        | Y473             | $\beta$ B        | 34    |                                 |                    |                             |          |          |
|    | Kelch4        | G476             |                  | 40    |                                 |                    |                             |          |          |
|    | Kelch4        | G477             |                  | 39    |                                 |                    |                             |          |          |
|    | Kelch4        | C483             | G/S/D(C483)L/T   | 11    | --                              | -1-5, -10, -39     | -23, -24                    | -40, -41 | --       |
|    | Kelch4        | E488             | $\beta$ C        | 17    |                                 |                    |                             |          |          |
| 21 | Kelch4        | C489             | E/Q/M/T(C489)Y/F | 15    | -9, -13, -14, -<br>22, -26, -36 | -2, -5, <b>-19</b> | -6, -21, -30, -<br>35       | --       | -11, -16 |
|    | Kelch4        | Y490             | $\beta$ C        | 32    |                                 |                    |                             |          |          |
|    | Kelch4        | P492             |                  | 34    |                                 |                    |                             |          |          |
|    | Kelch4        | W497             | $\beta$ D        | 41    |                                 |                    |                             |          |          |
|    | Kelch4        | C500             | (C500)A          | 4     | --                              | -1, -4, -5         | -38                         | --       | --       |
|    | <b>Kelch5</b> | <b>[507–550]</b> |                  |       |                                 |                    |                             |          |          |
|    | Kelch5        | R507             |                  | 34    |                                 |                    |                             |          |          |



|    |               |                  |                        |    |               |                      |                   |    |     |
|----|---------------|------------------|------------------------|----|---------------|----------------------|-------------------|----|-----|
|    | Kelch5        | G511             | $\beta$ A              | 20 |               |                      |                   |    |     |
|    | Kelch5        | C511             | <b>H</b> /L(C511)M/A/S | 4  | -9, -13, -31  | --                   | -23               | -- |     |
| 22 | Kelch5        | C513             | 3M/V/A(C513)T/S/V/G    | 5  | -9, -13, -36  | <b>-19</b>           | --                | -- | -16 |
| 23 | Kelch5        | C518             | N(C518)I/L             | 3  | --            | -8, <b>-19</b> , -27 | --                | -- | --  |
|    | Kelch5        | G523             |                        | 39 |               |                      |                   |    |     |
|    | Kelch5        | G524             |                        | 38 |               |                      |                   |    |     |
|    | Kelch5        | E535             | $\beta$ C              | 30 |               |                      |                   |    |     |
|    | Kelch5        | Y537             | $\beta$ C              | 40 |               |                      |                   |    |     |
|    | Kelch5        | W544             | $\beta$ D              | 41 |               |                      |                   |    |     |
|    | <b>Kelch6</b> | <b>[553–597]</b> |                        |    |               |                      |                   |    |     |
|    | Kelch6        | C557             | (C557)G                | 4  | --            | --                   | -6, -23, -24, -35 | -- | --  |
|    | Kelch6        | G558             | $\beta$ A              | 26 |               |                      |                   |    |     |
|    | Kelch6        | C559             | G/T/Q(C559)A/C/I       | 5  | -14, -26, -42 | -7                   | -38               | -- | --  |
|    | Kelch6        | C560             | V/I/C(C560)L/A/P/Y     | 7  | -26           | -1-5                 | --                | -- | -11 |
|    | Kelch6        | Y567             | $\beta$ B              | 30 |               |                      |                   |    |     |
|    | Kelch6        | G570             |                        | 36 |               |                      |                   |    |     |
|    | Kelch6        | G571             |                        | 35 |               |                      |                   |    |     |
|    | Kelch6        | E582             | $\beta$ C              | 17 |               |                      |                   |    |     |
| 24 | Kelch6        | C583             | E/L/Q/I(C583)Y/W/F     | 7  | -14, -31      | -10, -12, <b>-19</b> | -6, -24           | -- | --  |

|    |               |                                                          |                                          |    |                    |               |                    |     |     |
|----|---------------|----------------------------------------------------------|------------------------------------------|----|--------------------|---------------|--------------------|-----|-----|
|    | Kelch6        | Y584                                                     | $\beta$ C                                | 30 |                    |               |                    |     |     |
|    | Kelch6        | W591                                                     | $\beta$ D                                | 34 |                    |               |                    |     |     |
|    | <b>Kelch1</b> | <b>[598–611]</b><br>(loop and finishing $\beta$ -strand) |                                          |    |                    |               |                    |     |     |
|    |               | C602                                                     | R(C602)                                  | 4  | --                 | -12, -27, -28 | --                 | --  | -11 |
|    | Kelch1        | G605                                                     | $\beta$ A                                | 17 |                    |               |                    |     |     |
|    | Kelch1        | C605                                                     | A/G/S(C605)V/I                           | 9  | -33†               | -1, -4, -5    | -23, -24, -29, -35 | -41 | --  |
|    | Kelch1        | C607                                                     | V/I/C/A(C607)V/ <b>H</b>                 | 5  | --                 | -7, -10, -12  | -23                | --  | -11 |
|    | Kelch1        | C608                                                     | A/S/G/ <b>R</b> (C608) <b>T</b> /V/I/L/C | 5  | -14, -26, -31, -34 | -18           | --                 | --  | --  |
|    | <b>CTR</b>    | <b>[612–624]</b>                                         |                                          |    |                    |               |                    |     |     |
| 25 | CTR           | C613*                                                    | P(C613) <b>R</b>                         | 1  | --                 | <b>-19</b>    | --                 | --  | --  |
| 26 | CTR           | C622                                                     | N(C622)T                                 | 1  | --                 | <b>-19</b>    | --                 | --  | --  |
| 27 | CTR           | C624                                                     | T(C624)                                  | 1  | --                 | <b>-19</b>    | --                 | --  | --  |
